# Supplementary material for: Identification of a novel metastasis inducing lncRNA which suppresses the KAI1/CD82 metastasis suppressor gene and is upregulated in triple-negative breast cancer
Source: PubMed Central journal article supplement (PMC5620192; doi:10.18632/oncotarget.18733), 2017-06-28
Supplement: oncotarget-08-67538-s001.pdf [file oncotarget-08-67538-s001.pdf]

# Identification of a novel metastasis inducing lncRNA which suppresses the KAI1/CD82 metastasis suppressor gene and is upregulated in triple-negative breast cancer

## SUPPLEMENTARY MATERIALS

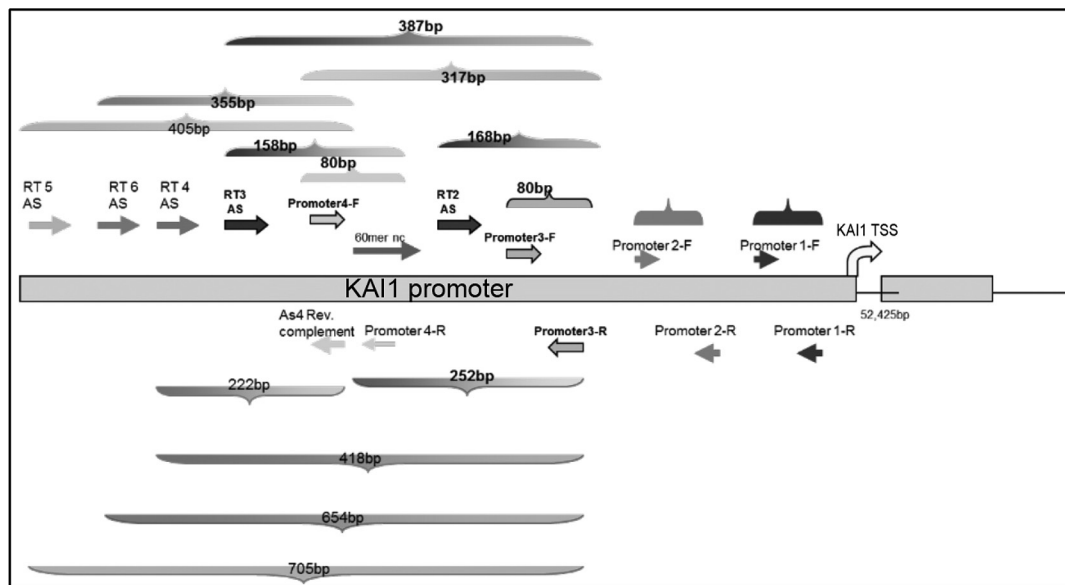

**Supplementary Figure 1: Scheme of primers location on the KAI1 as-lncRNA transcript.** Arrows indicate position of designed primers in either sense or antisense orientation, with sizes of the resulting amplicons (above and below).

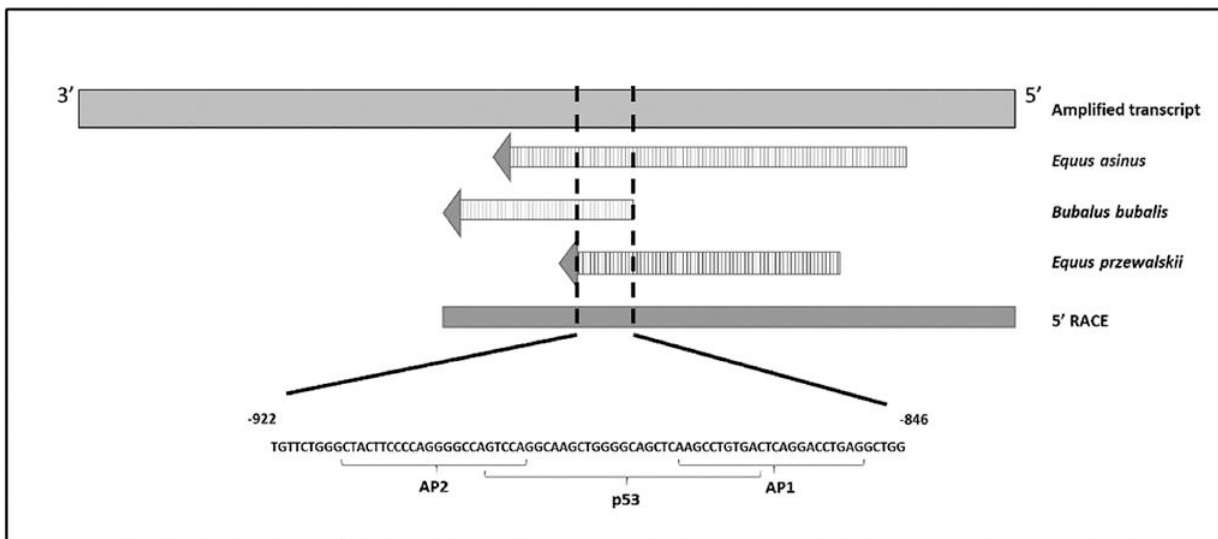

**Supplementary Figure 2: Mammalian transcripts homologous to KAI1 as-lncRNA.** Schematic illustration of the characterized KAI1 as-lncRNA transcript (top) and relative position of homologue transcripts found in *Equus asinus*, *Equus przewalskii* and *Bubalus bubalis* (middle three lines). 5' end of KAI1 as-lncRNA product (bottom line), with 76 nucleotide DNA sequence mutual to all transcripts known as the KAI1 enhancer with its transcription proteins binding sites.

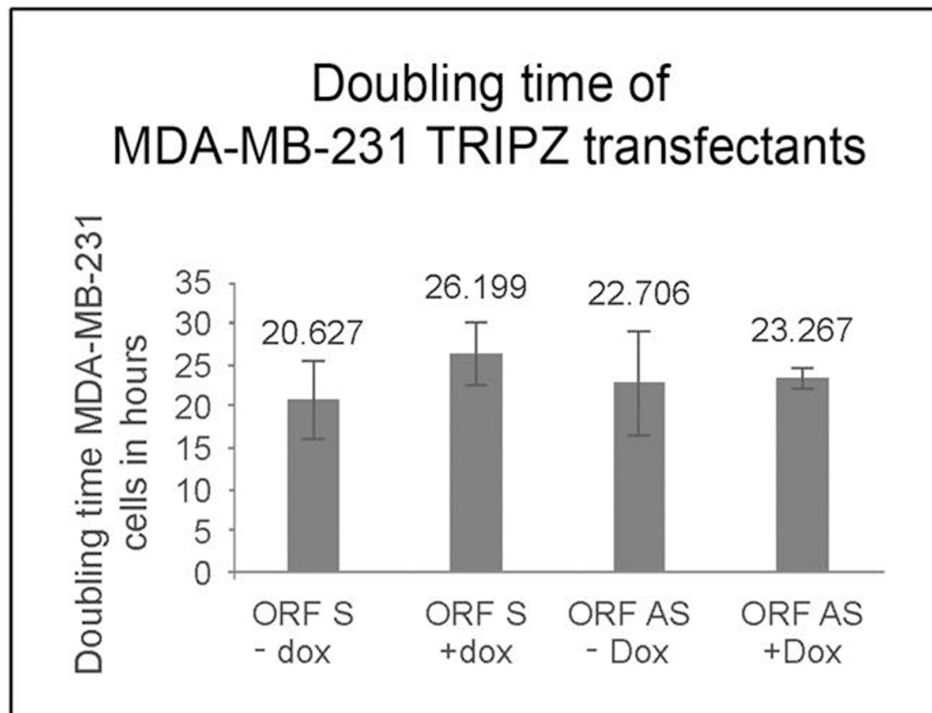

**Supplementary Figure 3: Doubling time of MDA-MB-231 cells after KAI1 overexpression.** MDA-MB-231 cells infected with the lentivirus TRIPZ-KAI1 ORF in sense or antisense orientation, under doxycycline induced (+dox) or noninduced (-dox) conditions. Doubling time tracked by resazurin cell viability assay over four days.

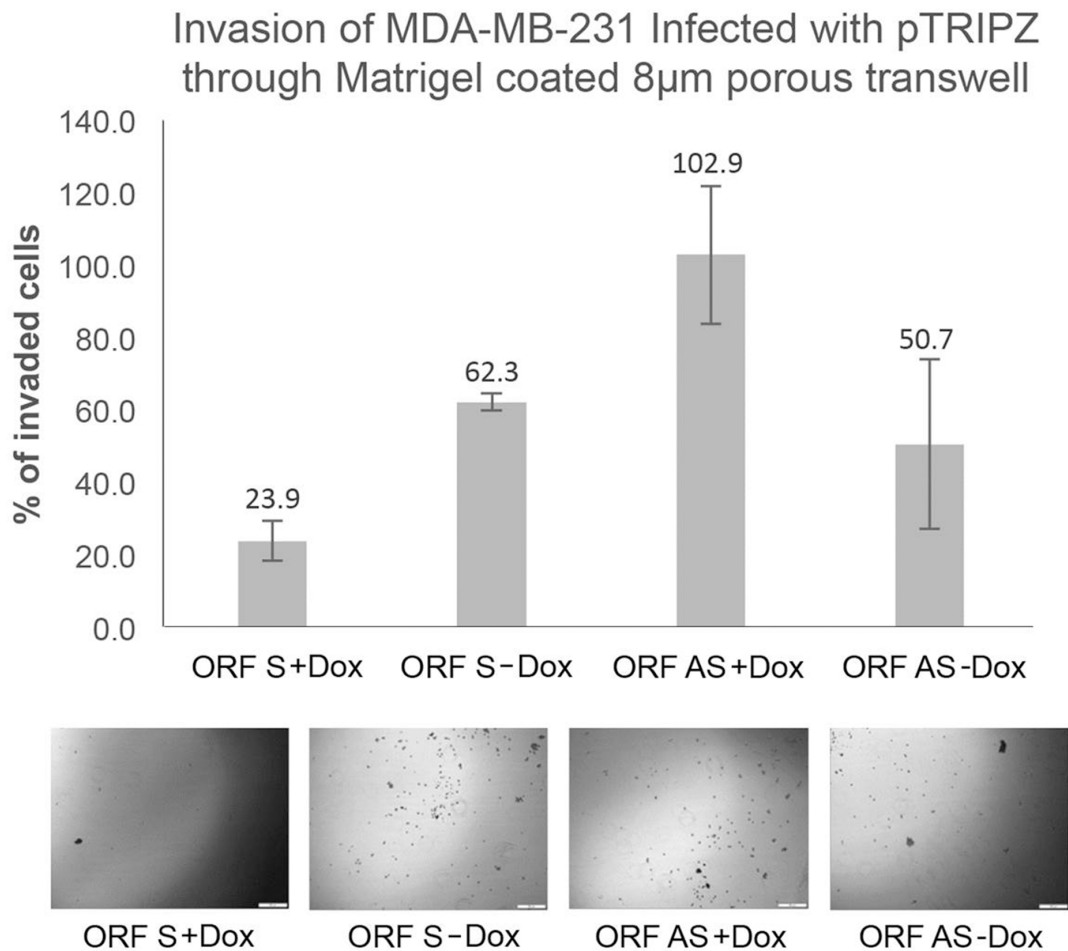

**Supplementary Figure 4: Invasion Assay with KAI1 Overexpressing MDA-MB-231 cells.** Induced or non-induced MDA-MB-231 cells infected with respective TRIPZ- KAI1 OE expressing viruses and seeded in Matrigel coated trans-well chamber. Cells invading from upper chamber to chemoattractant (10% serum) in lower chamber were detected using resazurin cell viability assay. Percent of invaded cells calculated by mock invasion control. Images were taken by light-field microscope camera.
